# Supplementary material for: Sedation and Anesthesia of Galapagos (Chelonoidis nigra), Aldabra (Aldabrachelys gigantea), and African Spurred Tortoises (Centrochelys sulcata): A Retrospective Review (2009–2019)
Source: MDPI journal article supplement (doi:10.3390/ani11102920), 2021-10-09
Supplement: s1 [file s1]

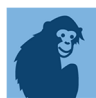

**Supplementary Material:** Anesthetic drug combinations used in Galapagos (*Chelonoidis nigra*; Gal), Aldabra (*Aldabrachelys gigantea*; Ald), and African spurred tortoises (*Centrochelys sulcata*; Sul), including the dose ranges and average dose used, the species they were used in, the effect (NR: not reported; Mod: moderate; Prof: profound), time to effect, and reported complications. Drugs used include medetomidine (Med), morphine (Morph), ketamine (Ket), midazolam (Midaz), methadone (Meth), detomidine (Detom), dexmedetomidine (Dex), hydromorphone (Hydro), and alfaxalone (Alfax). Drug dosages and time to effect are reported as a range and mean.

| Drug combination       | Times used | Dosage (mg/kg)                                                                                        | Species             | Effect                                                                                                       | Time to Effect (minutes) | Complications                                                                                                            |
|------------------------|------------|-------------------------------------------------------------------------------------------------------|---------------------|--------------------------------------------------------------------------------------------------------------|--------------------------|--------------------------------------------------------------------------------------------------------------------------|
| Med, Morph, Ket        | 4          | Med: 0.02-0.048 (0.034)<br>Morph: 0.35-0.48 (0.42)<br>Ket: 2-2.14 (2.06)                              | Ald (4)             | Mod (2 Ald)<br>NR (2 Ald)                                                                                    | 60-205 (118.3)           | Prolonged recovery (1); apnea (1)                                                                                        |
| Med, Midaz, Ket        | 26         | Med: 0.02-0.08 (0.04)<br>Midaz: 0.07-0.5 (0.25)<br>Ket: 1.97-10 (4.29)                                | Ald (8)<br>Gal (18) | No effect (1 Gal)<br>Mild (4; 1 Ald, 3 Gal)<br>Mod (5 Gal)<br>Prof (7; 1 Ald, 6 Gal)<br>NR (9; 6 Ald, 3 Gal) | 15-103 (52)              | Prolonged recovery (2); bradycardia (1); hypothermia (2); apnea (3); hemoptysis (1); hypocapnea (1); hypoventilation (1) |
| Med, Meth, Midaz, Ket  | 1          | Med: 0.0196<br>Meth: 0.33<br>Midaz: 0.065<br>Ket: 2.29                                                | Ald (1)             | Mild (1 Ald)                                                                                                 | 103                      | None                                                                                                                     |
| Morph, Midaz           | 1          | Morph: 0.88<br>Midaz: 0.44                                                                            | Gal (1)             | NR (1 Gal)                                                                                                   | NR                       | NR                                                                                                                       |
| Detom, Midaz, Ket      | 2          | Detom: 0.03-0.08 (0.055)<br>Midaz: 0.11-0.3 (0.2)<br>Ket: 2.27-5 (3.64)                               | Gal (2)             | Mild (1 Gal)<br>Prof (1 Gal)                                                                                 | 50-82 (66)               | Apnea (1)                                                                                                                |
| Med, Meth, Ket         | 1          | Med: 0.02<br>Meth: 0.2<br>Ket: 2.4                                                                    | Ald (1)             | Mod (1 Ald)                                                                                                  | 62                       | None                                                                                                                     |
| Med, Morph, Midaz, Ket | 2          | Med: 0.0129-0.02 (0.016)<br>Morph: 0.05-0.32 (0.19)<br>Midaz: 0.08-0.1 (0.09)<br>Ket: 1.6-2.17 (1.89) | Gal (2)             | Mod (2 Gal)                                                                                                  | 62-90 (76)               | Endotracheal tube occlusion (1)                                                                                          |
| Dex, Midaz, Ket        | 6          | Dex: 0.015-0.05 (0.0325)<br>Midaz: 0.06-0.3 (0.24)                                                    | Gal (5)<br>Sul (1)  | Mod (3 Gal)<br>Prof (1 Gal)<br>NR (2; 1 Gal, 1 Sul)                                                          | 41-94 (65)               | Prolonged recovery (1)                                                                                                   |

|                                 |   |                                                                                     |                    |                              |              |                                                                               |
|---------------------------------|---|-------------------------------------------------------------------------------------|--------------------|------------------------------|--------------|-------------------------------------------------------------------------------|
| Dex,<br>Hydro<br>Midaz,<br>Ket  | 5 | Ket: 1.86-5 (3.81)<br>Dex: 0.015-0.03 (0.021)<br>Hydro: 0.2<br>Midaz: 0.1-0.3 (0.2) | Sul (5)            | Mild (2 Sul)<br>NR (3 Sul)   | 45-85 (65)   | None                                                                          |
| Med,<br>Ket                     | 2 | Ket: 1.8-3 (2.56)<br>Med: 0.04-0.05 (0.045)                                         | Ald (1)<br>Gal (1) | Mild (1 Ald)<br>NR 1 (1 Gal) | NR           | Prolonged recovery (1)                                                        |
| Med,<br>Hydro,<br>Midaz,<br>Ket | 1 | Ket: 4-5 (4.5)<br>Med: 0.055<br>Hydro: 0.22<br>Midaz: 0.33                          | Ald (1)            | Mod (1 Ald)                  | 90           | Prolonged recovery (1)                                                        |
| Hydro,<br>Midaz,<br>Ket         | 1 | Ket: 5.5<br>Hydro: 0.1<br>Midaz: 0.2                                                | Sul (1)            | Mod (1 Sul)                  | NR           | None                                                                          |
| Med,<br>Hydro,<br>Ket           | 1 | Ket: 2.5<br>Med: 0.05<br>Hydro: 0.26                                                | Sul (1)            | Mod (1 Sul)                  | 78           | None                                                                          |
| Med,<br>Midaz,<br>Alfax         | 1 | Ket: 9.6<br>Med: 0.04<br>Midaz: 0.2                                                 | Gal (1)            | Mod (1 Gal)                  | 115          | None                                                                          |
| Detom,<br>Hydro,<br>Ket         | 1 | Alfax: 2<br>Detom: 0.014<br>Hydro: 0.024                                            | Gal (1)            | Mild (1 Gal)                 | NR           | None                                                                          |
| Dex<br>Morph,<br>Ket            | 4 | Ket: 5<br>Dex: 0.02-0.024 (0.02)<br>Morph: 0.38-0.4 (0.39)<br>Ket: 1.24-2.84 (2.23) | Gal (4)            | Mild (3 Gal)<br>NR (1 Gal)   | 50-90 (61.3) | Prolonged recovery (1);<br>bradycardia (1); apnea (1);<br>hypoventilation (1) |
| Dex,<br>Morph,<br>Midaz,<br>Ket | 1 | Dex: 0.02<br>Morph: 0.4<br>Midaz: 0.07<br>Ket: 2.86                                 | Gal (1)            | Mod (1 Gal)                  | 45           | Bradycardia; apnea                                                            |
| Dex<br>Meth,<br>Ket             | 2 | Dex: 0.02<br>Meth: 0.19<br>Ket: 2                                                   | Gal (2)            | Mild (1 Gal)<br>NR (1 Gal)   | 65-75 (70)   | None                                                                          |
| Midaz,<br>Ket                   | 1 | Midaz: 0.3<br>Ket: 5                                                                | Gal (1)            | NR (1 Gal)                   | NR           | None                                                                          |
